# Supplementary material for: Exposure to ozone impacted Th1/Th2 imbalance of CD4+ T cells and apoptosis of ASMCs underlying asthmatic progression by activating lncRNA PVT1-miR-15a-5p/miR-29c-3p signaling
Source: Aging (Albany NY). 2020 Nov 20;12(24):25229–55. doi: 10.18632/aging.104124 (PMC7803560; doi:10.18632/aging.104124)
Supplement: Supplementary Material 1 [file aging-12-104124-s003.xlsx]

## Sheet: Sheet2
Supplementary Material 1. MiRNAs potentially sponged by PVT1 were predicted with usage of starbase software.
miRNAid	miRNAname	Asthma	T cell	Infalmmation	ASMC	Cell proliferation	sponge	geneID	geneName	geneType	chromosome	start	end	strand	clipExpNum	degraExpNum	RBP	merClass	miRseq	align	targetSeq	pancancerNum
MIMAT0026483	hsa-miR-370-5p					Tumor suppressor [PMID:24055400；PMID:25469565]		ENSG00000249859	PVT1	lincRNA	chr8	128806931	128806953	+	2	0	AGO2	7mer-m8	cauugaCGUCUCUG-CACUGGAc	||:| | |||||||	auguugGCGGUCCCUGUGACCUg	7
MIMAT0002877	hsa-miR-513a-5p					Tumor suppressor [PMID:25095979]		ENSG00000249859	PVT1	lincRNA	chr8	128806933	128806950	+	2	0	AGO2	7mer-m8	uacuguggAGGGACACUu	|||||||||	guuggcggUCCCUGUGAc	3
MIMAT0000262	hsa-miR-187-3p					Tumor suppressor [PMID:27212161]		ENSG00000249859	PVT1	lincRNA	chr8	128806940	128806964	+	2	0	AGO2	7mer-m8	ggccGACGUUGUG---UUCUGUGCu	|||::|| : :|||||||	guccCUGUGACCUGUGGAGACACGg	8
MIMAT0005797	hsa-miR-1301-3p					Tumor suppressor [PMID:28469970]		ENSG00000249859	PVT1	lincRNA	chr8	128808152	128808175	+	1	0	AGO2	7mer-m8	cuucaguGAGGGUCCGUCGACGUu	||:|| || |||||||	gaaaaacCUUCCCGGAAGCUGCAg	3
MIMAT0020541	hsa-miR-5047							ENSG00000249859	PVT1	lincRNA	chr8	128808157	128808175	+	1	0	AGO2	7mer-m8	ugGAAUGUUGGCGUCGACGUu	||| | | | |||||||	acCUUCC--CGGAAGCUGCAg	0
MIMAT0017950	hsa-miR-2355-3p			Promotion [PMID:30817728]				ENSG00000249859	PVT1	lincRNA	chr8	128808161	128808184	+	1	0	AGO2	8mer	uagaggUUUGUCG--UUCCUGUUa	||:| || ||||||||	ucccggAAGCUGCAGAAGGACAAa	0
MIMAT0003214	hsa-miR-551a					Tumor suppressor [PMID:22469786]	Long non-coding RNA PVT1 regulatLong non-coding RNA PVT1 regulates effect of miR-551 on migration and invasion abilities of ovarian cancer through Wnt signaling pathwayes effect of miR-551 on migration and invasion abilities of ovarian cancer through Wnt signaling pathway	ENSG00000249859	PVT1	lincRNA	chr8	128866974	128866986	+	1	0	AGO1-4	7mer-m8	accuuuggUUCUCACCCAGCg	|:|: |||||||	#NAME?	2
MIMAT0003233	hsa-miR-551b-3p					Tumor suppressor [PMID:29337109]		ENSG00000249859	PVT1	lincRNA	chr8	128866974	128866986	+	1	0	AGO1-4	7mer-m8	gacuuuggUUCAUACCCAGCg	|:| |||||||	#NAME?	9
MIMAT0005955	hsa-miR-1197							ENSG00000249859	PVT1	lincRNA	chr8	128866974	128866994	+	1	0	AGO1-4	7mer-m8	ucuucAUCUGGUACACAGGAu	|:|::|: |||||||	agggcUGGGUCGCGUGUCCUg	6
MIMAT0021020	hsa-miR-5000-3p							ENSG00000249859	PVT1	lincRNA	chr8	128866974	128866995	+	1	0	AGO1-4	7mer-m8	agguucaagucuuCACAGGACu	||||||||	agggcugggucgcGUGUCCUGg	3
MIMAT0018952	hsa-miR-4436a							ENSG00000249859	PVT1	lincRNA	chr8	128866976	128866995	+	1	0	AGO1-4	7mer-m8	uaGGUGAAGACGGACAGGACg	|:: || || |||||||	ggCUGGGUC-GCGUGUCCUGg	1
MIMAT0027499	hsa-miR-6799-3p							ENSG00000249859	PVT1	lincRNA	chr8	128866980	128867002	+	1	0	AGO1-4	7mer-m8	gaCACCCCUGUGGUACGUCCCGu	|| | | || |||||||	ggGUCGCGUGUCCUGGCAGGGCc	0
MIMAT0019214	hsa-miR-3173-5p							ENSG00000249859	PVT1	lincRNA	chr8	128866981	128867002	+	1	0	AGO1-4	7mer-m8	uuuccucuuuuGUCCGUCCCGu	| ||||||||	ggucgcgugucCUGGCAGGGCc	1
MIMAT0000752	hsa-miR-328-3p					Tumor suppressor [PMID:27530148]		ENSG00000249859	PVT1	lincRNA	chr8	128866983	128867004	+	1	0	AGO1-4	7mer-m8	ugccuucccGUCUCUCCCGGUc	| |: |||||||	ucgcgugucCUGGCAGGGCCAc	8
MIMAT0006790	hsa-miR-675-3p							ENSG00000249859	PVT1	lincRNA	chr8	128867000	128867019	+	1	0	AGO1-4	7mer-m8	acucGCCACUCCCGUAUGUc	| | || |||||||	gccaCAGGAAGAGCAUACAc	2
MIMAT0026606	hsa-miR-511-3p	Under-expression [PMID:28629744]				Tumor suppressor [PMID:28624527]		ENSG00000249859	PVT1	lincRNA	chr8	128867002	128867022	+	1	0	AGO1-4	7mer-m8	agacagaaaaCG-AUGUGUAa	|| |||||||	cacaggaagaGCAUACACAUc	1
MIMAT0014990	hsa-miR-3127-5p					Tumor suppressor [PMID:25284075]		ENSG00000249859	PVT1	lincRNA	chr8	128867480	128867502	+	1	0	AGO1-4	7mer-m8	gaaggguaaggugUUCGGGACUa	|||||||||	gauugagccggugAAGCCCUGAg	2
MIMAT0004682	hsa-miR-361-3p							ENSG00000249859	PVT1	lincRNA	chr8	128867520	128867542	+	1	0	AGO1-4	7mer-m8	uuuaGUCUUAGUGUGGACCCCCu	::||: :|| |||||||	uggaUGGAGAAGCAGCUGGGGGc	1
MIMAT0015064	hsa-miR-3184-5p							ENSG00000249859	PVT1	lincRNA	chr8	128902854	128902877	+	4	0	AGO2	8mer	uuuucgagccagaCUCCGGGGAGu	|| |||||||	aggagauuaaaaaGAUGCCCCUCa	0
MIMAT0004748	hsa-miR-423-5p					Tumor promoter [PMID:28381178]		ENSG00000249859	PVT1	lincRNA	chr8	128902855	128902877	+	4	0	AGO2	8mer	uuucagagcgagagACGGGGAGu	||||||||	ggagauuaaaaagaUGCCCCUCa	1
MIMAT0002835	hsa-miR-526b-5p					Tumor suppressor [PMID:25596743]; Tumor promoter [PMID:25733698]		ENSG00000249859	PVT1	lincRNA	chr8	128902860	128902881	+	4	0	AGO2	7mer-m8	ugUCUUUC-ACGAAGGGAGUUCUc	| |||| ||| |||||||||	uuAAAAAGAUGC--CCCUCAAGAu	2
MIMAT0022276	hsa-miR-5581-3p							ENSG00000249859	PVT1	lincRNA	chr8	128902885	128902906	+	2	1	AGO2	7mer-m8	ccuUGAAGAUCCUCCGUACCUu	:| | | | |||||||	uguGCCUGUCAGCUGCAUGGAg	0
MIMAT0000080	hsa-miR-24-3p					Tumor promoter [PMID:23254855]	PVT1 depletion protects cartilage ATDC5 cells against LPS-induced inflammatory injury by regulating the miR-24/ADAMTS5 axis	ENSG00000249859	PVT1	lincRNA	chr8	128902909	128902931	+	4	0	AGO2	7mer-m8	gaCAAGGACG-ACUUGACUCGGu	|||| |: | |||||||	ucGUUCAAGUAUUUUCUGAGCCu	2
MIMAT0028212	hsa-miR-7151-5p							ENSG00000249859	PVT1	lincRNA	chr8	128902917	128902939	+	2	0	AGO2	7mer-m8	cgguuauguccgucuCUACCUAg	|||||||	guauuuucugagccuGAUGGAUu	1
MIMAT0000243	hsa-miR-148a-3p		Promote M1 polarization [PMID:29085372]			Tumor promoter [PMID:26791485]		ENSG00000249859	PVT1	lincRNA	chr8	128902970	128902991	+	2	0	AGO1-4,AGO2	7mer-m8	uguuucaagacaucACGUGACu	|||||||	cgcugguggaaccaUGCACUGg	7
MIMAT0000759	hsa-miR-148b-3p					Tumor suppressor [PMID:23171948]		ENSG00000249859	PVT1	lincRNA	chr8	128902970	128902991	+	2	0	AGO1-4,AGO2	7mer-m8	uguuucaagacacUACGUGACu	||||||||	cgcugguggaaccAUGCACUGg	3
MIMAT0000438	hsa-miR-152-3p					Tumor suppressor [PMID:29156728]	[PMID:28258379]	ENSG00000249859	PVT1	lincRNA	chr8	128902971	128902991	+	2	0	AGO1-4,AGO2	7mer-m8	gguucaagacaGUACGUGACu	|||||||||	gcugguggaacCAUGCACUGg	13
MIMAT0003150	hsa-miR-455-5p			Inhibition [PMID:30310937]			[PMID:29637007]	ENSG00000249859	PVT1	lincRNA	chr8	128902992	128903013	+	2	0	AGO1-4,AGO2	7mer-m8	gcuacaucagguuuCCGUGUAu	|||||||	aaugacacacgcccGGCACAUu	1
MIMAT0000244	hsa-miR-30c-5p			Inhibition [PMID:29016810]		Tumor suppressor [PMID:28686969]		ENSG00000249859	PVT1	lincRNA	chr8	128903110	128903137	+	1	1	AGO1-4	7mer-m8	cgACUCUCACAUC-CU----ACAAAUGu	|||||| || | || |||||||	gcUGAGAGGGUUGAGAUCUCUGUUUACu	4
MIMAT0000420	hsa-miR-30b-5p					Tumor suppressor [PMID:28536082]		ENSG00000249859	PVT1	lincRNA	chr8	128903111	128903137	+	1	1	AGO1-4	7mer-m8	ucgaCUCACAUC-CU----ACAAAUGu	||| || | || |||||||	cugaGAGGGUUGAGAUCUCUGUUUACu	2
MIMAT0000087	hsa-miR-30a-5p			Inhibition [PMID:27581464]		Tumor suppressor [PMID:22287560]		ENSG00000249859	PVT1	lincRNA	chr8	128903113	128903137	+	1	1	AGO1-4	7mer-m8	gaaggUCAGCUC---CUACAAAUGu	:||:||| |||||||	gagagGGUUGAGAUCUCUGUUUACu	12
MIMAT0000245	hsa-miR-30d-5p					Tumor suppressor [PMID:29552759]		ENSG00000249859	PVT1	lincRNA	chr8	128903116	128903137	+	1	0	AGO1-4	7mer-m8	gaaggucagccccuACAAAUGu	|||||||	aggguugagaucucUGUUUACu	5
MIMAT0000692	hsa-miR-30e-5p					Tumor suppressor [PMID:28656629]		ENSG00000249859	PVT1	lincRNA	chr8	128903116	128903137	+	1	0	AGO1-4	7mer-m8	gaaggucaguuccuACAAAUGu	|||||||	aggguugagaucucUGUUUACu	6
MIMAT0004614	hsa-miR-193a-5p					Tumor suppressor [PMID:25232258]		ENSG00000249859	PVT1	lincRNA	chr8	128903160	128903186	+	1	0	AGO1-4	7mer-m8	agUAGAGCGG-GCGU----UUCUGGGu	:|||| |: :| | |||||||	ggGUCUCCCUAUGGAAUGUAAGACCCc	6
MIMAT0004702	hsa-miR-339-3p					Tumor suppressor [PMID:27197185]		ENSG00000249859	PVT1	lincRNA	chr8	128903210	128903232	+	1	0	AGO1-4	8mer	gcCGAGACAGCAGCUCCGCGAGu	|| | || : |||||||	auGCACGUUCCAUCCGGCGCUCa	2
MIMAT0015056	hsa-miR-3179							ENSG00000249859	PVT1	lincRNA	chr8	128944886	128944911	+	1	0	AGO2	7mer-m8	ugcaaAU-UUAAAGU---GGGGAAGa	|| |: |||| |||||||	cuacgUACAGCUUCAAGGCCCCUUCu	0
MIMAT0004785	hsa-miR-545-5p					Tumor promoter [PMID:30127618]		ENSG00000249859	PVT1	lincRNA	chr8	128951879	128951900	+	1	0	AGO2	7mer-m8	aguagauuauuuGUAAAUGACu	| |||||||	cuugguguucccCUUUUACUGc	0
MIMAT0000273	hsa-miR-216a-5p		Promote M1 polarization [PMID:29940270]			Tumor suppressor [PMID:30425570]		ENSG00000249859	PVT1	lincRNA	chr8	128951891	128951916	+	1	0	AGO2	7mer-m8	agugucaACGGUC----GACUCUAAu	|||||| ||||||||	cuuuuacUGCCAGGACACUGAGAUUu	5
MIMAT0002826	hsa-miR-515-5p					Tumor suppressor [PMID:29136957]		ENSG00000249859	PVT1	lincRNA	chr8	128951899	128951922	+	1	0	AGO2	7mer-m8	gucuuucacgaaagaAAACCUCUu	||||||||	gccaggacacugagaUUUGGAGAg	2
MIMAT0002828	hsa-miR-519e-5p							ENSG00000249859	PVT1	lincRNA	chr8	128951901	128951922	+	1	0	AGO2	7mer-m8	cuuucacgagggaAAACCUCUu	||||||||	caggacacugagaUUUGGAGAg	4
MIMAT0000100	hsa-miR-29b-3p					Tumor suppressor [PMID:28779971]		ENSG00000249859	PVT1	lincRNA	chr8	128952169	128952190	+	2	0	AGO1-4	8mer	uuGUGACUAAAGUUUACCACGAu	||:||: | | ||||||||	ggCAUUGGGAU-ACAUGGUGCUa	1
MIMAT0000086	hsa-miR-29a-3p			Inhibition [PMID:25674218]		Tumor suppressor [PMID:25674218]		ENSG00000249859	PVT1	lincRNA	chr8	128952170	128952190	+	2	0	AGO1-4	8mer	auUGGCUAAAGUCUACCACGAu	|::|: | | ||||||||	gcAUUGGGAU-ACAUGGUGCUa	2
MIMAT0000681	hsa-miR-29c-3p	Under-expression [PMID:30075787]						ENSG00000249859	PVT1	lincRNA	chr8	128952170	128952190	+	2	0	AGO1-4	8mer	auUGGCUAAAGUUUACCACGAu	|::|: | | ||||||||	gcAUUGGGAU-ACAUGGUGCUa	8
MIMAT0022726	hsa-miR-1306-5p							ENSG00000249859	PVT1	lincRNA	chr8	128952220	128952239	+	2	0	AGO1-4	7mer-m8	accUGCAAACGUCCCCUCCACc	:| ||| | |||||||	ccuGCAUUU--UGUGGAGGUGg	2
MIMAT0004780	hsa-miR-532-3p							ENSG00000249859	PVT1	lincRNA	chr8	128952226	128952247	+	2	0	AGO1-4	8mer	acguucggaaCCCACACCCUCc	| | |||||||	uuuuguggagGUGGGUGGGAGa	6
MIMAT0004954	hsa-miR-543					Tumor promotor [PMID:28938633]		ENSG00000249859	PVT1	lincRNA	chr8	128952231	128952253	+	2	0	AGO1-4	7mer-m8	uuCUUCACGUG-GCGCUUACAAa	||:||| :: | |||||||	ugGAGGUGGGUGGGAGAAUGUUc	5
MIMAT0016895	hsa-miR-2355-5p			Promotion [PMID:30817728]				ENSG00000249859	PVT1	lincRNA	chr8	128952243	128952263	+	2	0	AGO1-4	8mer	aacagguaacauaGACCCCUa	|||||||	ggagaauguucccCUGGGGAa	1
MIMAT0000262	hsa-miR-187-3p					Tumor suppressor [PMID:27544906]		ENSG00000249859	PVT1	lincRNA	chr8	128952254	128952278	+	2	0	AGO1-4	7mer-m8	ggccgaCGUUGU---GUUCUGUGCu	| |||| | |||||||	cccuggGGAACAUGCCUAGACACGg	8
MIMAT0000431	hsa-miR-140-5p			Inhibition [PMID:29901170]		Tumor suppressor [PMID:26297547]	[PMID:31222482]	ENSG00000249859	PVT1	lincRNA	chr8	128952329	128952350	+	3	0	AGO1-4	7mer-m8	gaugguaucccaUUUUGGUGAc	|||||||||	gaccgcuuucacAAAACCACUg	1
MIMAT0004953	hsa-miR-873-5p					Tumor suppressor [PMID:29790668]		ENSG00000249859	PVT1	lincRNA	chr8	128952349	128952369	+	3	0	AGO1-4	7mer-m8	uccUCUGAGUGUUCAAGGACg	||:: :::||||||||	ugcAGGUGAGUGAGUUCCUGc	6
MIMAT0000271	hsa-miR-214-3p	Up-regulation [PMID:28804539]					[PMID:28800314]	ENSG00000249859	PVT1	lincRNA	chr8	128952351	128952372	+	3	0	AGO1-4	8mer	ugacggaCAGACACGGACGACa	|| || |||||||	caggugaGUGAGUUCCUGCUGa	2
MIMAT0010364	hsa-miR-761					Tumor suppressor [PMID:26563371]		ENSG00000249859	PVT1	lincRNA	chr8	128952351	128952372	+	3	0	AGO1-4	8mer	acaCAGUCAAAGUGGGACGACg	|| ||| :|||||||	cagGUGAGUGAGUUCCUGCUGa	0
MIMAT0017999	hsa-miR-3619-5p					Tumor suppressor [PMID:27878260]		ENSG00000249859	PVT1	lincRNA	chr8	128952353	128952372	+	3	0	AGO1-4	8mer	cgACGUGGUCGGACGGACGACu	|| :: || | |||||||	ggUGAGUGAG--UUCCUGCUGa	1
MIMAT0002841	hsa-miR-518f-5p							ENSG00000249859	PVT1	lincRNA	chr8	128952373	128952396	+	3	0	AGO1-4	7mer-m8	cucuuUCACGA--AGGGAGAUCUc	|| || | :|||||||	auaucAGGCCUGGUGUCUCUAGAc	3
MIMAT0002845	hsa-miR-526a			Promotion [PMID:25056901]				ENSG00000249859	PVT1	lincRNA	chr8	128952373	128952396	+	3	0	AGO1-4	7mer-m8	gucuuUCACGA--AGGGAGAUCUc	|| || | :|||||||	auaucAGGCCUGGUGUCUCUAGAc	1
MIMAT0005455	hsa-miR-520c-5p					Tumor suppressor [PMID:28423501]		ENSG00000249859	PVT1	lincRNA	chr8	128952373	128952396	+	3	0	AGO1-4	7mer-m8	gucuuUCACGA--AGGGAGAUCUc	|| || | :|||||||	auaucAGGCCUGGUGUCUCUAGAc	1
MIMAT0005456	hsa-miR-518d-5p							ENSG00000249859	PVT1	lincRNA	chr8	128952373	128952396	+	3	0	AGO1-4	7mer-m8	gucuuUCACGA--AGGGAGAUCUc	|| || | :|||||||	auaucAGGCCUGGUGUCUCUAGAc	0
MIMAT0002831	hsa-miR-519c-5p							ENSG00000249859	PVT1	lincRNA	chr8	128952374	128952396	+	3	0	AGO1-4	7mer-m8	gucuUUCGCGA--AGGGAGAUCUc	|:|| || | :|||||||	uaucAGGC-CUGGUGUCUCUAGAc	0
MIMAT0005449	hsa-miR-523-5p							ENSG00000249859	PVT1	lincRNA	chr8	128952374	128952396	+	3	0	AGO1-4	7mer-m8	gucuUUCGCGA--AGGGAGAUCUc	|:|| || | :|||||||	uaucAGGC-CUGGUGUCUCUAGAc	0
MIMAT0005450	hsa-miR-518e-5p					Tumor promotor [PMID:30541960]		ENSG00000249859	PVT1	lincRNA	chr8	128952374	128952396	+	3	0	AGO1-4	7mer-m8	gucuUUCGCGA--AGGGAGAUCUc	|:|| || | :|||||||	uaucAGGC-CUGGUGUCUCUAGAc	1
MIMAT0005451	hsa-miR-522-5p							ENSG00000249859	PVT1	lincRNA	chr8	128952374	128952396	+	3	0	AGO1-4	7mer-m8	gucuUUCGCGA--AGGGAGAUCUc	|:|| || | :|||||||	uaucAGGC-CUGGUGUCUCUAGAc	0
MIMAT0005452	hsa-miR-519a-5p							ENSG00000249859	PVT1	lincRNA	chr8	128952374	128952396	+	3	0	AGO1-4	7mer-m8	gucuUUCGCGA--AGGGAGAUCUc	|:|| || | :|||||||	uaucAGGC-CUGGUGUCUCUAGAc	2
MIMAT0005454	hsa-miR-519b-5p							ENSG00000249859	PVT1	lincRNA	chr8	128952374	128952396	+	3	0	AGO1-4	7mer-m8	gucuUUCGCGA--AGGGAGAUCUc	|:|| || | :|||||||	uaucAGGC-CUGGUGUCUCUAGAc	0
MIMAT0003296	hsa-miR-627-5p					Tumor suppressor[PMID:31161900]		ENSG00000249859	PVT1	lincRNA	chr8	128952380	128952400	+	1	0	AGO1-4	7mer-m8	agGAGAAAAGAAUCUCUGAGUg	|| | || | |||||||	gcCUGGUGUC-UCUAGACUCAu	0
MIMAT0003294	hsa-miR-625-5p					Tumor suppressor[PMID:30988674]		ENSG00000249859	PVT1	lincRNA	chr8	128952386	128952411	+	1	0	AGO1-4	8mer	ccuGAUAUCU---UG--AAAGGGGGa	|| |||| |: ||||||||	uguCUCUAGACUCAUUAUUUCCCCCa	1
MIMAT0000772	hsa-miR-345-5p					Tumor promotor [PMID:29748958]		ENSG00000249859	PVT1	lincRNA	chr8	128952534	128952553	+	1	0	AGO1-4	7mer-m8	cucGGGACCUGAUCCUCAGUCg	|::| |: || |||||||	caaCUUUUGG-UA-GAGUCAGc	4
MIMAT0000437	hsa-miR-145-5p	Up-regulation [PMID:28804539]				Tumor suppressor[PMID:29344125]		ENSG00000249859	PVT1	lincRNA	chr8	128952572	128952592	+	1	0	AGO1-4	7mer-m8	ucccuaaGGACCCUUUUGACCUg	:||||| |||||||	guugccaUCUGGG--AACUGGAu	5
MIMAT0021127	hsa-miR-5195-3p					Tumor suppressor[PMID:28109084]		ENSG00000249859	PVT1	lincRNA	chr8	128952572	128952592	+	1	0	AGO1-4	7mer-m8	ucggGGGAGUCUCUUGACCUa	|| || |:||||||||	guugCCAUCUGGGAACUGGAu	0
MIMAT0022483	hsa-miR-5691							ENSG00000249859	PVT1	lincRNA	chr8	128952602	128952625	+	1	0	AGO1-4	7mer-m8	cgaAAGAGCCUC-GA-GUCUCGUu	||| ||| || |||||||	uucUUCCAUGAGACUGCAGAGCAg	2
MIMAT0019218	hsa-miR-3194-3p							ENSG00000249859	PVT1	lincRNA	chr8	128952603	128952624	+	1	0	AGO1-4	8mer	ugACGGUCACUC-GUCGUCUCGa	| ||| |||| | |||||||	ucUUCCA-UGAGACUGCAGAGCa	0
MIMAT0027511	hsa-miR-6805-3p							ENSG00000249859	PVT1	lincRNA	chr8	128952603	128952625	+	1	0	AGO1-4	7mer-m8	gacccccgcccccuCGUCUCGUu	||||||||	ucuuccaugagacuGCAGAGCAg	0
MIMAT0000752	hsa-miR-328-3p					Tumor suppressor[PMID:27530148]		ENSG00000249859	PVT1	lincRNA	chr8	128952614	128952639	+	1	0	AGO1-4	7mer-m8	ugcCUUCCCGUCU---C-UCCCGGUc	| || ||||| | |||||||	acuGCAGAGCAGAACGGCAGGGCCAg	8
MIMAT0019214	hsa-miR-3173-5p							ENSG00000249859	PVT1	lincRNA	chr8	128952616	128952637	+	1	0	AGO1-4	7mer-m8	uuucCUC-UUUUGUCCGUCCCGu	||| |:||| ||||||||	ugcaGAGCAGAAC-GGCAGGGCc	1
MIMAT0027499	hsa-miR-6799-3p					Tumor biomarker[PMID:25706130]		ENSG00000249859	PVT1	lincRNA	chr8	128952616	128952637	+	1	0	AGO1-4	7mer-m8	gacaCCCCUGUGGUACGUCCCGu	| | | | |: |||||||	ugcaGAGCAGAACG-GCAGGGCc	0
MIMAT0003881	hsa-miR-668-3p							ENSG00000249859	PVT1	lincRNA	chr8	128952670	128952691	+	2	0	AGO1-4,AGO2	7mer-m8	caucaccCGGCUCGGCUCACUGu	||:| ||:|||||||	gcuccuuGCUG-GCUGAGUGACc	4
MIMAT0026483	hsa-miR-370-5p					Tumor promotor [PMID:28631573]		ENSG00000249859	PVT1	lincRNA	chr8	128952671	128952693	+	2	0	AGO1-4,AGO2	7mer-m8	cauuGACGUCU--CUGCACUGGAc	:||| |: || |||||||	cuccUUGCUGGCUGA-GUGACCUu	7
MIMAT0000710	hsa-miR-365a-3p					Tumor ptomotor[PMID:26883008]		ENSG00000249859	PVT1	lincRNA	chr8	128952680	128952700	+	2	0	AGO1-4,AGO2	7mer-m8	uauuccuaaaaaucCCCGUAAu	|||||||	ggcugagugaccuuGGGCAUU-	0
MIMAT0022834	hsa-miR-365b-3p					Tumor suppressor[PMID:23660406]		ENSG00000249859	PVT1	lincRNA	chr8	128952680	128952700	+	2	0	AGO1-4,AGO2	7mer-m8	uauuccuaaaaaucCCCGUAAu	|||||||	ggcugagugaccuuGGGCAUU-	0
MIMAT0000070	hsa-miR-17-5p			Inhibition [PMID:30506107]				ENSG00000249859	PVT1	lincRNA	chr8	129001417	129001439	+	1	0	AGO1	7mer-m8	gaUGGACGUGACAUUCGUGAAAc	||||| : | ||:|||||||	acACCUGGGAUUUAGGCACUUUc	0
MIMAT0000075	hsa-miR-20a-5p			Inhibition [PMID:30684894]		Tumor suppressor[PMID:29473328]	[PMID:30001707]	ENSG00000249859	PVT1	lincRNA	chr8	129001417	129001439	+	1	0	AGO1	7mer-m8	gaUGGACGUGAUAUUCGUGAAAu	||||| : | ||:|||||||	acACCUGGGAUUUAGGCACUUUc	0
MIMAT0000093	hsa-miR-93-5p			Inhibition [PMID:27866993]		Tumor promotor [PMID:29309884]		ENSG00000249859	PVT1	lincRNA	chr8	129001417	129001439	+	1	0	AGO1	7mer-m8	gaUGGA-CGUGCUUGUCGUGAAAc	|||| | |: | :|||||||	acACCUGGGAUUUA-GGCACUUUc	2
MIMAT0000103	hsa-miR-106a-5p	Up-regulation in mice model [PMID:22700801]				Tumor suppressor [PMID:27383537]		ENSG00000249859	PVT1	lincRNA	chr8	129001417	129001439	+	1	0	AGO1	7mer-m8	gaUGGACGUGACAUUCGUGAAAa	||||| : | ||:|||||||	acACCUGGGAUUUAGGCACUUUc	1
MIMAT0001413	hsa-miR-20b-5p	Inhibit airway inflammation in asthmatic mice [PMID:28680329]						ENSG00000249859	PVT1	lincRNA	chr8	129001417	129001439	+	1	0	AGO1	7mer-m8	gaUGGACGUGAUACUCGUGAAAc	||||| : | | :|||||||	acACCUGGGAUUUAGGCACUUUc	5
MIMAT0002836	hsa-miR-526b-3p					Tumor suppressor [PMID:27398161]		ENSG00000249859	PVT1	lincRNA	chr8	129001417	129001439	+	1	0	AGO1	7mer-m8	cggaGAUUUU-CCUUCGUGAAAg	||:::| |:|||||||	acacCUGGGAUUUAGGCACUUUc	2
MIMAT0002853	hsa-miR-519d-3p					Tumor suppressor[PMID:29188531]	[PMID:30304557]	ENSG00000249859	PVT1	lincRNA	chr8	129001418	129001439	+	1	0	AGO1	7mer-m8	gugagauuucccUCCGUGAAAc	|||||||||	caccugggauuuAGGCACUUUc	2
MIMAT0000680	hsa-miR-106b-5p			Promotion [PMID:28957555]；Alleviation [PMID:29144032]				ENSG00000249859	PVT1	lincRNA	chr8	129001419	129001439	+	1	0	AGO1	7mer-m8	uaGACGUGACAGUCGUGAAAu	||| : | | :|||||||	acCUGGGAUUUAGGCACUUUc	1
MIMAT0018199	hsa-miR-3924							ENSG00000249859	PVT1	lincRNA	chr8	129001437	129001458	+	1	4	AGO1	7mer-m8	ucaucgucagUGUAUAUGUAUa	| | |||||||	uucaaucugaAAAAAUACAUAu	1
MIMAT0004929	hsa-miR-190b					Tumor suppressor[PMID:29441873]; Tumor promotor[PMID:29509256]		ENSG00000249859	PVT1	lincRNA	chr8	129001440	129001460	+	1	5	AGO1	7mer-m8	uuGGGUUAUAGUUUGUAUAGu	:|::| | | |||||||	aaUCUGAAAAAAUACAUAUCc	1
MIMAT0000458	hsa-miR-190a-5p					Tumor suppressor [PMID:29501773]	[PMID:29501773]	ENSG00000249859	PVT1	lincRNA	chr8	129001441	129001460	+	1	5	AGO1	7mer-m8	ugGAUUAUAUAGUUUGUAUAGu	||:| | | | |||||||	auCUGAAAAA--AUACAUAUCc	4
MIMAT0004763	hsa-miR-488-3p			Inhibition [PMID:28915828]		Tumor suppressor[PMID:28328082]	[PMID:29501773]	ENSG00000249859	PVT1	lincRNA	chr8	129001446	129001466	+	2	4	AGO1,AGO1-4	7mer-m8	cuggUUCUUUAUCGGAAAGUu	|| | ||| |||||||	aaaaAAUACAUAUCCUUUCAg	4
MIMAT0019917	hsa-miR-4766-5p					Tumor suppressor [PMID:29752439]		ENSG00000249859	PVT1	lincRNA	chr8	129001447	129001467	+	2	1	AGO1,AGO1-4	7mer-m8	uugUGGUUGACGAGAAAGUCu	| :| | : |||||||	aaaAAUACAUAUCCUUUCAGc	1
MIMAT0002833	hsa-miR-520a-5p					Tumor suppressor[PMID:24870597]		ENSG00000249859	PVT1	lincRNA	chr8	129001456	129001476	+	2	0	AGO1,AGO1-4	7mer-m8	ucuuucAUGAAGGGAGACCUc	| | | |||||||	uauccuUUCAGCACUCUGGAc	3
MIMAT0002838	hsa-miR-525-5p							ENSG00000249859	PVT1	lincRNA	chr8	129001456	129001476	+	2	0	AGO1,AGO1-4	7mer-m8	ucuuucACGUAGGGAGACCUc	| || | |||||||	uauccuUUCAGCACUCUGGAc	1
MIMAT0002823	hsa-miR-512-3p					Tumor suppressor [PMID:20372864]		ENSG00000249859	PVT1	lincRNA	chr8	129001463	129001471	+	2	0	AGO1,AGO1-4	7mer-m8	cuggagucgauacuGUCGUGAa	|||||||	#NAME?	2
MIMAT0005789	hsa-miR-513c-5p					Tumor promotor [PMID:29138809]		ENSG00000249859	PVT1	lincRNA	chr8	129001466	129001487	+	2	0	AGO1,AGO1-4	8mer	uauuugcugUGGAGGAACUCUu	|| |||||||	gcacucuggACGGACUUGAGAa	4
MIMAT0015087	hsa-miR-514b-5p							ENSG00000249859	PVT1	lincRNA	chr8	129001466	129001487	+	2	0	AGO1,AGO1-4	8mer	uacuaacggagggaGAACUCUu	|||||||	gcacucuggacggaCUUGAGAa	4
MIMAT0026483	hsa-miR-370-5p					Tumor ptromotor [PMID:28631573]		ENSG00000249859	PVT1	lincRNA	chr8	129001484	129001505	+	2	0	AGO1,AGO1-4	8mer	caUUGACGUCUCUGCACUGGAc	|||||: |||||||||	agAACUGUCCUUACGUGACCUa	7
MIMAT0026615	hsa-miR-552-5p							ENSG00000249859	PVT1	lincRNA	chr8	129008854	129008873	+	3	0	AGO1-4,AGO2	7mer-m8	ggUUGUCCGUUUUCCAAUUUg	|||| :: :|||||||	uaAACA-AUGUUGGGUUAAAg	2
MIMAT0011778	hsa-miR-2278					Tumor suppressor [PMID:25953263]		ENSG00000249859	PVT1	lincRNA	chr8	129010477	129010497	+	1	0	AGO1-4	7mer-m8	ggUCCGUUGUGUGUGACGAGAg	|| ::||: | |||||||	gaAGAGGGCAUUC-CUGCUCUu	0
MIMAT0005944	hsa-miR-1252-5p							ENSG00000249859	PVT1	lincRNA	chr8	129010479	129010503	+	1	0	AGO1-4	7mer-m8	auUUACUUAAG--UUA-AAGGAAGa	|: | |||| : | |||||||	agAGGGCAUUCCUGCUCUUCCUUCu	2
MIMAT0005903	hsa-miR-1251-5p							ENSG00000249859	PVT1	lincRNA	chr8	129010494	129010516	+	1	0	AGO1-4	7mer-m8	ucgcGGAAACCGU--CGAUCUCa	|||| || |||||||	ucuuCCUUCUCCAUGGCUAGAGg	5
MIMAT0018939	hsa-miR-4424							ENSG00000249859	PVT1	lincRNA	chr8	129010542	129010563	+	1	0	AGO1-4	7mer-m8	aucagguaaaaCUCAAUUGAGa	|| |||||||	ucuaccugggaGAUUUAACUCc	1
MIMAT0019704	hsa-miR-4644					Tumor promotor[PMID:27573701]		ENSG00000249859	PVT1	lincRNA	chr8	129010549	129010571	+	1	0	AGO1-4	7mer-m8	gaagacAGAGAAAAGAGAGAGGu	|:| | ||||||||	gggagaUUUAACUCCUCUCUCCu	1
MIMAT0000455	hsa-miR-185-5p					Tumor suppressor[PMID:29246288]		ENSG00000249859	PVT1	lincRNA	chr8	129010553	129010571	+	1	0	AGO1-4	7mer-m8	aguccUUGACGGAAAGAGAGGu	|||| || |||||||	gauuuAACU-CC--UCUCUCCu	2
MIMAT0016858	hsa-miR-4306					inhibit proliferation of macrophages [PMID:30183452]		ENSG00000249859	PVT1	lincRNA	chr8	129010555	129010571	+	1	0	AGO1-4	7mer-m8	augacggaaAGAGAGGu	|||||||	uuuaacuccUCUCUCCu	0
MIMAT0022276	hsa-miR-5581-3p					Tumor promotor [PMID:30825207]		ENSG00000249859	PVT1	lincRNA	chr8	129010577	129010599	+	3	0	AGO1-4	7mer-m8	ccuUGAAGAU-CCUCCGUACCUu	|:|| || |||||||	uuuAUUUAUAUAUCAGCAUGGAc	0
MIMAT0000256	hsa-miR-181a-5p			Inhibition [PMID:23516523]		Tumor suppressor [PMID:28086904]		ENSG00000249859	PVT1	lincRNA	chr8	129021917	129021939	+	2	0	AGO1-4	7mer-m8	ugaguggcugucgcaACUUACAa	|||||||	ugaucugucuugaugUGAAUGUg	3
MIMAT0000257	hsa-miR-181b-5p	Under-expression [PMID:27192552]						ENSG00000249859	PVT1	lincRNA	chr8	129021917	129021939	+	2	0	AGO1-4	7mer-m8	uggguggcugucguUACUUACAa	:|||||||	ugaucugucuugauGUGAAUGUg	4
MIMAT0002821	hsa-miR-181d-5p							ENSG00000249859	PVT1	lincRNA	chr8	129021917	129021939	+	2	0	AGO1-4	7mer-m8	uggguggcuguuguUACUUACAa	:|||||||	ugaucugucuugauGUGAAUGUg	7
MIMAT0000258	hsa-miR-181c-5p					Tumor suppressor [PMID:24345480]		ENSG00000249859	PVT1	lincRNA	chr8	129021918	129021939	+	2	0	AGO1-4	7mer-m8	ugaguggcuguccaACUUACAa	|||||||	gaucugucuugaugUGAAUGUg	9
MIMAT0004593	hsa-miR-130a-5p							ENSG00000249859	PVT1	lincRNA	chr8	129021920	129021941	+	2	0	AGO1-4	8mer	cgucugucaucgugUUACACUu	|||||||	ucugucuugaugugAAUGUGAa	2
MIMAT0018000	hsa-miR-23c							ENSG00000249859	PVT1	lincRNA	chr8	129021920	129021941	+	2	0	AGO1-4	8mer	cccauuAGUGACCGUUACACUa	|:: || |||||||	ucugucUUGAUGUGAAUGUGAa	2
MIMAT0000078	hsa-miR-23a-3p					Tumor promotor [PMID:26110567]		ENSG00000249859	PVT1	lincRNA	chr8	129021921	129021941	+	2	0	AGO1-4	8mer	ccuuuagggACCGUUACACUa	|| |||||||	cugucuugaUGUGAAUGUGAa	4
MIMAT0000418	hsa-miR-23b-3p							ENSG00000249859	PVT1	lincRNA	chr8	129021921	129021941	+	2	0	AGO1-4	8mer	ccauuagggACCGUUACACUa	|| |||||||	cugucuugaUGUGAAUGUGAa	9
MIMAT0016894	hsa-miR-4262					Tumor promotor [PMID:27629257]		ENSG00000249859	PVT1	lincRNA	chr8	129021923	129021939	+	2	0	AGO1-4	7mer-m8	guccAUCAGACUUACAg	|: | |||||||	gucuUGAUGUGAAUGUg	0
MIMAT0000437	hsa-miR-145-5p	Over-expression [PMID:29344125 ]		Th1/Th2 balance		Tumor suppressor [PMID:29344125]		ENSG00000249859	PVT1	lincRNA	chr8	129022568	129022590	+	1	0	AGO1-4	7mer-m8	ucccuaaggacccUUUUGACCUg	:||||||||	ugcuagggugacaGAAACUGGAc	5
MIMAT0021127	hsa-miR-5195-3p					Tumor suppressor [PMID:28109084]		ENSG00000249859	PVT1	lincRNA	chr8	129022571	129022590	+	1	0	AGO1-4	7mer-m8	ucgggggaGUCUCUUGACCUa	|||| |||||||	uagggugaCAGA-AACUGGAc	0
MIMAT0000417	hsa-miR-15b-5p					Tumor suppressor [PMID:28646148]		ENSG00000249859	PVT1	lincRNA	chr8	129082485	129082507	+	2	0	AGO1,AGO1-4	8mer	acauuugguacuAC-ACGACGAu	|| |||||||	guuugcuucuccUGUUGCUGCUa	0
MIMAT0000069	hsa-miR-16-5p					Tumor promotor [PMID:26821018]		ENSG00000249859	PVT1	lincRNA	chr8	129082486	129082507	+	2	0	AGO1,AGO1-4	8mer	gcgguuauaaaugcACGACGAu	|||||||	uuugcuucuccuguUGCUGCUa	0
MIMAT0000461	hsa-miR-195-5p					Tumor suppressor [PMID:29204446]	[PMID:28296507]	ENSG00000249859	PVT1	lincRNA	chr8	129082486	129082507	+	2	0	AGO1,AGO1-4	8mer	cgguuauaAAGAC-ACGACGAu	| ||| |||||||	uuugcuucUCCUGUUGCUGCUa	4
MIMAT0001341	hsa-miR-424-5p			Inhibition [PMID:28566713]		Tumor promotor [PMID:28893265]	[PMID:28276314]	ENSG00000249859	PVT1	lincRNA	chr8	129082486	129082507	+	2	0	AGO1,AGO1-4	8mer	aaguuuuguacuUAACGACGAc	:||||||||	uuugcuucuccuGUUGCUGCUa	0
MIMAT0027578	hsa-miR-6838-5p							ENSG00000249859	PVT1	lincRNA	chr8	129082486	129082507	+	2	0	AGO1,AGO1-4	8mer	uccucAGAACGGUGACGACGAa	|: | |:::|||||||	uuugcUUCUCCUGUUGCUGCUa	0
MIMAT0000068	hsa-miR-15a-5p	Under-expression [PMID:23954351]						ENSG00000249859	PVT1	lincRNA	chr8	129082487	129082507	+	2	0	AGO1,AGO1-4	8mer	guguuugguaAUACACGACGAu	|:| |||||||	uugcuucuccUGU-UGCUGCUa	0
MIMAT0019062	hsa-miR-4524a-5p					Tumor suppressor [PMID:23007737]		ENSG00000249859	PVT1	lincRNA	chr8	129082487	129082508	+	2	0	AGO1,AGO1-4	7mer-m8	acucuguccaaguACGACGAUa	||||||||	uugcuucuccuguUGCUGCUAg	1
MIMAT0002820	hsa-miR-497-5p					Tumor suppressor [PMID:27531900]	[PMID:29133127]	ENSG00000249859	PVT1	lincRNA	chr8	129082488	129082507	+	2	0	AGO1,AGO1-4	8mer	uguuuGGUGUCACACGACGAc	|: | || |||||||	ugcuuCUCCUGU-UGCUGCUa	3
MIMAT0022255	hsa-miR-4524b-5p					Tumor promotor[PMID:30939162]		ENSG00000249859	PVT1	lincRNA	chr8	129082488	129082508	+	2	0	AGO1,AGO1-4	7mer-m8	cucuguccGAAUACGACGAUa	|| ||||||||	ugcuucucCUGUUGCUGCUAg	0
MIMAT0001638	hsa-miR-409-5p					Tumor promotor [PMID:28459205]		ENSG00000249859	PVT1	lincRNA	chr8	129082501	129082525	+	2	0	AGO1,AGO1-4	8mer	uacguuUCAAC-GAGC-CCAUUGGa	||| | | :| |||||||	gcugcuAGUGGACAUGAGGUAACCa	6
MIMAT0000076	hsa-miR-21-5p			Inhibition [PMID:27421180]		Tumor promotor [PMID:27421180]		ENSG00000249859	PVT1	lincRNA	chr8	129082525	129082548	+	1	0	AGO1-4	7mer-m8	agUUGUAGUCAG--ACUAUUCGAu	|:| | : || |||||||||	acAGCCUAGUUCUGUGAUAAGCUc	2
MIMAT0003258	hsa-miR-590-5p					Tumor promotor [PMID:23803188]		ENSG00000249859	PVT1	lincRNA	chr8	129082528	129082548	+	1	0	AGO1-4	7mer-m8	gacGUGAAAAUACUUAUUCGAg	:| || |:|| |||||||	gccUAGUUCUGUG-AUAAGCUc	0
MIMAT0017988	hsa-miR-3611							ENSG00000249859	PVT1	lincRNA	chr8	129082535	129082555	+	1	0	AGO1-4	7mer-m8	auucuuaaagaaAGAAGUGUu	||||||||	ucugugauaagcUCUUCACAc	1
MIMAT0003215	hsa-miR-552-3p					Tumor promotor [PMID:24778034]		ENSG00000249859	PVT1	lincRNA	chr8	129082542	129082560	+	2	0	AGO1-4	8mer	aacaGAUUGGUCAGUGGACAa	|| :|| |||||||	uaagCUCUUCA--CACCUGUa	3
MIMAT0004784	hsa-miR-455-3p					Tumor suppressor [PMID:28770965]	[PMID:29637007]	ENSG00000249859	PVT1	lincRNA	chr8	129082554	129082574	+	2	1	AGO1-4	7mer-m8	cacAUAUACGGGUACCUGACg	|:|| | :||||||||	accUGUACCCAUAUGGACUGu	3
MIMAT0004780	hsa-miR-532-3p					Tumor suppressor [PMID:29558748]		ENSG00000249859	PVT1	lincRNA	chr8	129082558	129082580	+	2	1	AGO1-4	8mer	acguucggaACC-CACACCCUCc	||| ||||||||	guacccauaUGGACUGUGGGAGa	6
MIMAT0000703	hsa-miR-361-5p					Tumor suppressor [PMID:25965817]		ENSG00000249859	PVT1	lincRNA	chr8	129082568	129082593	+	2	0	AGO1-4	7mer-m8	caUGGGGACCUCU---A-AGACUAUu	||: : ||||| | |||||||	ggACUGUGGGAGAGUUUCUCUGAUAu	5
MIMAT0000084	hsa-miR-27a-3p					Tumor promotor [PMID:23254855]		ENSG00000249859	PVT1	lincRNA	chr8	129082585	129082603	+	2	0	AGO1-4	7mer-m8	cgccUUGAAUCGGUGACACUu	:|: |:| |||||||	cucuGAUAUGG--ACUGUGAu	0
MIMAT0000419	hsa-miR-27b-3p					Tumor suppressor [PMID:29028088]		ENSG00000249859	PVT1	lincRNA	chr8	129082585	129082603	+	2	0	AGO1-4	7mer-m8	cgucUUGAAUCGGUGACACUu	:|: |:| |||||||	cucuGAUAUGG--ACUGUGAu	1
MIMAT0023713	hsa-miR-6088							ENSG00000249859	PVT1	lincRNA	chr8	129113313	129113333	+	1	0	AGO1-4	7mer-m8	gcGGGGGGGC-GAAGUAGAGa	|| :: || :||||||||	acCCAUUACGAUUUCAUCUCu	0
MIMAT0000435	hsa-miR-143-3p				Inhibit proliferation [PMID:27639060]		[PMID:30825877]	ENSG00000249859	PVT1	lincRNA	chr8	129113315	129113333	+	1	0	AGO1-4	7mer-m8	cucGAUGUCACGAAGUAGAGu	:|||: | ||||||||	ccaUUACGAU--UUCAUCUCu	8
MIMAT0019924	hsa-miR-4770							ENSG00000249859	PVT1	lincRNA	chr8	129113316	129113333	+	1	0	AGO1-4	7mer-m8	ucGAUGUCACAGUAGAGu	:|||: | |||||||	caUUACGAUUUCAUCUCu	3
MIMAT0000460	hsa-miR-194-5p			Inhibition [PMID:30945295]				ENSG00000249859	PVT1	lincRNA	chr8	129113345	129113366	+	1	0	AGO1-4	7mer-m8	aggUGUACCUCAACGACAAUGu	:|| || |||||||	ucaGCAGCAAGCACCUGUUACc	6
MIMAT0010251	hsa-miR-449c-5p							ENSG00000249859	PVT1	lincRNA	chr8	129113375	129113399	+	1	2	AGO1-4	7mer-m8	ugucGGCGAUCGUUAUGUGACGGAu	|| || | | |||||||	cccaCCCCUUCCCCCAAACUGCCUu	1
MIMAT0000685	hsa-miR-34b-5p			Inhibition [PMID:29150939]				ENSG00000249859	PVT1	lincRNA	chr8	129113377	129113399	+	1	0	AGO1-4	7mer-m8	guuagucgauuacUGUGACGGAu	| |||||||	caccccuucccccAAACUGCCUu	2
MIMAT0013517	hsa-miR-2682-5p							ENSG00000249859	PVT1	lincRNA	chr8	129113377	129113399	+	1	0	AGO1-4	7mer-m8	cugcagacuugucagUGACGGAc	|||||||	caccccuucccccaaACUGCCUu	2
MIMAT0000456	hsa-miR-186-5p					Tumor suppressor [PMID:28656879]	[PMID:28122299]	ENSG00000249859	PVT1	lincRNA	chr8	129113471	129113492	+	1	0	AGO2	7mer-m8	ucggguuuuccucUUAAGAAAc	||||||||	cucgugucuauuaAAUUCUUUu	1
